## Supplementary data

### **Protocol for heat processing of oropharyngeal swaps prior to RT-qPCR for SARS-CoV-2 using the SensiFAST™ Probe No-ROX One-Step Real-time PCR kit (Bioline®).**

Transfer 10 µl of the saline/transport solution from the collection tube to a PCR tube and heat the tube for 5 min. at 98°C followed by 2 min. at 4°C. Briefly spin the samples and transfer 5 µl to 20 µl of the SensiFAST™ Probe No-ROX One-Step Real-time PCR mastermix. The mastermix consists of 12.5 µl 2x SensiFAST Probe No-ROX One-Step Mix, 0.25 µl reverse Transcriptase, 0.5 µl Ribosafe RNA inhibitor, 0.5 µl forward primer (20 µM), 0.5 µl reverse primer (20 µM) and 0.25 µl probe (20 µM) and 5.5 µl nuclease-free water. The primers, probes and RT-qPCR conditions used for SARS-CoV-2 detection is the previous published primers and probes for the E-gene by Corman et al., Eurosurveillance, January 2020. The RT-qPCR reaction in this study was performed using the Mx3005P thermal cycler from Strategene.
